# Supplementary material for: miRe2e: a full end-to-end deep model based on transformers for prediction of pre-miRNAs
Source: Oxford University Press journal article supplement (doi:10.1093/bioinformatics/btab823), 2021-12-01
Supplement: btab823_supplementary_data.pdf [file btab823_supplementary_data.pdf]

# miRe2e: a full end-to-end deep model based on Transformers for prediction of pre-miRNAs

J. Raad, L. Bugnon, D.H. Milone and G. Stegmayer

Research Institute for Signals, Systems and Computational Intelligence sinc(*i*)  
(FICH-UNL/CONICET), Ciudad Universitaria, Santa Fe, Argentina.

## Supplementary Material

PyTorch<sup>1</sup> was used to build and train the deep learning models. Our models were trained on a Nvidia Titan V GPU with 12 Gb of RAM. The architecture of the neural models are detailed in the following tables. We evaluated several loss functions, optimizers and learning rates on training data.

The selected loss functions were: Mean Squared Error (MSE) for the Structure prediction model and the MFE estimation model; and Focal Loss (FL) (Lin *et al.*, 2017) for the pre-miRNA classifier. The FL adds an extra factor to the standard cross entropy criterion, which allows reducing the relative loss for well-classified examples and puts more focus on hard, misclassified examples. The FL used here was

$$FL(p_\tau) = -\alpha(1 - p_\tau)^\gamma \log(p_\tau), \quad (1)$$

where  $p_\tau$  is the predicted probability (output score) for the sequence under analysis, the parameter  $\gamma$  can be used to increase or reduce the weight given to those samples that are correctly classified, and  $\alpha$  is a weighting factor to address class imbalance. We have used  $\alpha = 1.0$  and  $\gamma = 4.0$ .

The optimizer selected was Stochastic Gradient Descent (SGD) with Nesterov momentum (Sutskever *et al.*, 2013), and a learning rate of  $10^{-3}$ . Regarding the training process, each module was pre-trained separately and in cascade, using the outputs of the previous pre-trained model as inputs to the next model. No fine-tuning of the complete model was required. More implementation details are provided in the following tables and the source code<sup>2</sup>.

---

<sup>1</sup><https://pytorch.org/>

<sup>2</sup><https://github.com/sinc-lab/miRe2e>

Table 1: Structure predictor.

| Layer (type)               | Output shape           | Param # |
|----------------------------|------------------------|---------|
| ReLU-1                     | [4, 100]               | 0       |
| BatchNorm1d-2              | [4, 100]               | 8       |
| Conv1d-3                   | [111, 100]             | 1,443   |
| ReLU-4                     | [111, 100]             | 0       |
| BatchNorm1d-5              | [111, 100]             | 222     |
| Conv1d-6                   | [111, 100]             | 37,074  |
| ReLU-7                     | [111, 100]             | 0       |
| BatchNorm1d-8              | [111, 100]             | 222     |
| Conv1d-9                   | [111, 100]             | 37,074  |
| ResNet-10                  | [111, 100]             | 0       |
| ReLU-11                    | [111, 100]             | 0       |
| BatchNorm1d-12             | [111, 100]             | 222     |
| Conv1d-13                  | [111, 100]             | 37,074  |
| ReLU-14                    | [111, 100]             | 0       |
| BatchNorm1d-15             | [111, 100]             | 222     |
| Conv1d-16                  | [111, 100]             | 37,074  |
| ResNet-17                  | [111, 100]             | 0       |
| ReLU-18                    | [111, 100]             | 0       |
| BatchNorm1d-19             | [111, 100]             | 222     |
| Conv1d-20                  | [111, 100]             | 37,074  |
| ReLU-21                    | [111, 100]             | 0       |
| BatchNorm1d-22             | [-1, 111, 100]         | 222     |
| Conv1d-23                  | [111, 100]             | 37,074  |
| ResNet-24                  | [111, 100]             | 0       |
| EncoderStr-25              | [111, 100]             | 0       |
| MultiheadAttention-26      | [[2, 222], [100, 100]] | 0       |
| Dropout-27                 | [2, 222]               | 0       |
| LayerNorm-28               | [2, 222]               | 444     |
| Linear-29                  | [2, 888]               | 198,024 |
| Dropout-30                 | [2, 888]               | 0       |
| Linear-31                  | [2, 222]               | 197,358 |
| Dropout-32                 | [2, 222]               | 0       |
| LayerNorm-33               | [2, 222]               | 444     |
| TransformerEncoderLayer-34 | [2, 222]               | 0       |
| MultiheadAttention-35      | [[2, 222], [100, 100]] | 0       |
| Dropout-36                 | [2, 222]               | 0       |
| LayerNorm-37               | [2, 222]               | 444     |
| Linear-38                  | [2, 888]               | 198,024 |
| Dropout-39                 | [2, 888]               | 0       |
| Linear-40                  | [2, 222]               | 197,358 |
| Dropout-41                 | [2, 222]               | 0       |
| LayerNorm-42               | [2, 222]               | 444     |
| TransformerEncoderLayer-43 | [2, 222]               | 0       |
| MultiheadAttention-44      | [[2, 222], [100, 100]] | 0       |
| Dropout-45                 | [2, 222]               | 0       |
| LayerNorm-46               | [2, 222]               | 444     |
| Linear-47                  | [2, 888]               | 198,024 |
| Dropout-48                 | [2, 888]               | 0       |
| Linear-49                  | [2, 222]               | 197,358 |
| Dropout-50                 | [2, 222]               | 0       |
| LayerNorm-51               | [2, 222]               | 444     |
| TransformerEncoderLayer-52 | [2, 222]               | 0       |
| MultiheadAttention-53      | [[2, 222], [100, 100]] | 0       |
| Dropout-54                 | [2, 222]               | 0       |
| LayerNorm-55               | [2, 222]               | 444     |
| Linear-56                  | [2, 888]               | 198,024 |
| Dropout-57                 | [2, 888]               | 0       |
| Linear-58                  | [2, 222]               | 197,358 |
| Dropout-59                 | [2, 222]               | 0       |
| LayerNorm-60               | [2, 222]               | 444     |
| TransformerEncoderLayer-61 | [2, 222]               | 0       |
| MultiheadAttention-62      | [[2, 222], [100, 100]] | 0       |
| Dropout-63                 | [2, 222]               | 0       |
| LayerNorm-64               | [2, 222]               | 444     |
| Linear-65                  | [2, 888]               | 198,024 |
| Dropout-66                 | [2, 888]               | 0       |

|                            |                        |         |
|----------------------------|------------------------|---------|
| Linear-67                  | [2, 222]               | 197,358 |
| Dropout-68                 | [2, 222]               | 0       |
| LayerNorm-69               | [2, 222]               | 444     |
| TransformerEncoderLayer-70 | [2, 222]               | 0       |
| MultiheadAttention-71      | [[2, 222], [100, 100]] | 0       |
| Dropout-72                 | [2, 222]               | 0       |
| LayerNorm-73               | [2, 222]               | 444     |
| Linear-74                  | [2, 888]               | 198,024 |
| Dropout-75                 | [2, 888]               | 0       |
| Linear-76                  | [2, 222]               | 197,358 |
| Dropout-77                 | [2, 222]               | 0       |
| LayerNorm-78               | [2, 222]               | 444     |
| TransformerEncoderLayer-79 | [2, 222]               | 0       |
| TransformerEncoder-80      | [2, 222]               | 0       |
| Dropout-81                 | [100, 222]             | 0       |
| Linear-82                  | [100, 100]             | 22,300  |
| ELU-83                     | [100, 100]             | 0       |
| Dropout-84                 | [100, 100]             | 0       |
| Linear-85                  | [100, 10]              | 1,010   |
| ELU-86                     | [100, 10]              | 0       |
| Linear-87                  | [100, 1]               | 11      |
| Tanh-88                    | [100, 1]               | 0       |

Table 2: MFE estimation model.

| Layer (type)   | Output shape | Param # |
|----------------|--------------|---------|
| ReLU-1         | [5, 100]     | 0       |
| BatchNorm1d-2  | [5, 100]     | 10      |
| Conv1d-3       | [64, 100]    | 1,024   |
| ReLU-4         | [64, 100]    | 0       |
| BatchNorm1d-5  | [64, 100]    | 128     |
| Conv1d-6       | [64, 100]    | 12,352  |
| ReLU-7         | [64, 100]    | 0       |
| BatchNorm1d-8  | [64, 100]    | 128     |
| Conv1d-9       | [64, 100]    | 12,352  |
| ResNet-10      | [64, 100]    | 0       |
| AvgPool1d-11   | [64, 50]     | 0       |
| ReLU-12        | [64, 50]     | 0       |
| BatchNorm1d-13 | [64, 50]     | 128     |
| Conv1d-14      | [64, 50]     | 12,352  |
| ReLU-15        | [64, 50]     | 0       |
| BatchNorm1d-16 | [64, 50]     | 128     |
| Conv1d-17      | [64, 50]     | 12,352  |
| ResNet-18      | [64, 50]     | 0       |
| AvgPool1d-19   | [64, 25]     | 0       |
| ReLU-20        | [64, 25]     | 0       |
| BatchNorm1d-21 | [64, 25]     | 128     |
| Conv1d-22      | [64, 25]     | 12,352  |
| ReLU-23        | [64, 25]     | 0       |
| BatchNorm1d-24 | [64, 25]     | 128     |
| Conv1d-25      | [64, 25]     | 12,352  |
| ResNet-26      | [64, 25]     | 0       |
| AvgPool1d-27   | [64, 12]     | 0       |
| Encoder-28     | [64, 12]     | 0       |
| Linear-29      | [100]        | 76,900  |
| ELU-30         | [100]        | 0       |
| BatchNorm1d-31 | [100]        | 200     |
| Linear-32      | [30]         | 3,030   |
| ELU-33         | [30]         | 0       |
| BatchNorm1d-34 | [30]         | 60      |
| Linear-35      | [1]          | 31      |
| ELU-36         | [1]          | 0       |

Table 3: Pre-miRNA classifier.

| Layer (type)   | Output shape | Param # |
|----------------|--------------|---------|
| ReLU-1         | [5, 100]     | 0       |
| BatchNorm1d-2  | [5, 100]     | 10      |
| Conv1d-3       | [64, 100]    | 1,024   |
| ReLU-4         | [64, 100]    | 0       |
| BatchNorm1d-5  | [64, 100]    | 128     |
| Conv1d-6       | [64, 100]    | 12,352  |
| ReLU-7         | [64, 100]    | 0       |
| BatchNorm1d-8  | [64, 100]    | 128     |
| Conv1d-9       | [64, 100]    | 12,352  |
| ResNet-10      | [64, 100]    | 0       |
| ReLU-11        | [64, 100]    | 0       |
| BatchNorm1d-12 | [64, 100]    | 128     |
| Conv1d-13      | [64, 100]    | 12,352  |
| ReLU-14        | [64, 100]    | 0       |
| BatchNorm1d-15 | [64, 100]    | 128     |
| Conv1d-16      | [64, 100]    | 12,352  |
| ResNet-17      | [64, 100]    | 0       |
| ReLU-18        | [64, 100]    | 0       |
| BatchNorm1d-19 | [64, 100]    | 128     |
| Conv1d-20      | [64, 100]    | 12,352  |
| ReLU-21        | [64, 100]    | 0       |
| BatchNorm1d-22 | [64, 100]    | 128     |
| Conv1d-23      | [64, 100]    | 12,352  |
| ResNet-24      | [64, 100]    | 0       |
| AvgPool1d-25   | [64, 50]     | 0       |
| ReLU-26        | [64, 50]     | 0       |
| BatchNorm1d-27 | [64, 50]     | 128     |
| Conv1d-28      | [64, 50]     | 12,352  |
| ReLU-29        | [64, 50]     | 0       |
| BatchNorm1d-30 | [64, 50]     | 128     |
| Conv1d-31      | [64, 50]     | 12,352  |
| ResNet-32      | [64, 50]     | 0       |
| ReLU-33        | [64, 50]     | 0       |
| BatchNorm1d-34 | [64, 50]     | 128     |
| Conv1d-35      | [64, 50]     | 12,352  |
| ReLU-36        | [64, 50]     | 0       |
| BatchNorm1d-37 | [64, 50]     | 128     |
| Conv1d-38      | [64, 50]     | 12,352  |
| ResNet-39      | [64, 50]     | 0       |
| ReLU-40        | [64, 50]     | 0       |
| BatchNorm1d-41 | [64, 50]     | 128     |
| Conv1d-42      | [64, 50]     | 12,352  |
| ReLU-43        | [64, 50]     | 0       |
| BatchNorm1d-44 | [64, 50]     | 128     |
| Conv1d-45      | [64, 50]     | 12,352  |
| ResNet-46      | [64, 50]     | 0       |
| AvgPool1d-47   | [64, 25]     | 0       |
| ReLU-48        | [64, 25]     | 0       |
| BatchNorm1d-49 | [64, 25]     | 128     |
| Conv1d-50      | [64, 25]     | 12,352  |
| ReLU-51        | [64, 25]     | 0       |
| BatchNorm1d-52 | [64, 25]     | 128     |
| Conv1d-53      | [64, 25]     | 12,352  |
| ResNet-54      | [64, 25]     | 0       |
| ReLU-55        | [64, 25]     | 0       |
| BatchNorm1d-56 | [64, 25]     | 128     |
| Conv1d-57      | [64, 25]     | 12,352  |
| ReLU-58        | [64, 25]     | 0       |
| BatchNorm1d-59 | [64, 25]     | 128     |
| Conv1d-60      | [64, 25]     | 12,352  |
| ResNet-61      | [64, 25]     | 0       |
| ReLU-62        | [64, 25]     | 0       |
| BatchNorm1d-63 | [64, 25]     | 128     |
| Conv1d-64      | [64, 25]     | 12,352  |
| ReLU-65        | [64, 25]     | 0       |
| BatchNorm1d-66 | [64, 25]     | 128     |

|                             |                   |           |
|-----------------------------|-------------------|-----------|
| Conv1d-67                   | [64, 25]          | 12,352    |
| ResNet-68                   | [64, 25]          | 0         |
| AvgPool1d-69                | [64, 12]          | 0         |
| ReLU-70                     | [64, 12]          | 0         |
| BatchNorm1d-71              | [64, 12]          | 128       |
| Conv1d-72                   | [64, 12]          | 12,352    |
| ReLU-73                     | [64, 12]          | 0         |
| BatchNorm1d-74              | [64, 12]          | 128       |
| Conv1d-75                   | [64, 12]          | 12,352    |
| ResNet-76                   | [64, 12]          | 0         |
| ReLU-77                     | [64, 12]          | 0         |
| BatchNorm1d-78              | [64, 12]          | 128       |
| Conv1d-79                   | [64, 12]          | 12,352    |
| ReLU-80                     | [64, 12]          | 0         |
| BatchNorm1d-81              | [64, 12]          | 128       |
| Conv1d-82                   | [64, 12]          | 12,352    |
| ResNet-83                   | [64, 12]          | 0         |
| ReLU-84                     | [64, 12]          | 0         |
| BatchNorm1d-85              | [64, 12]          | 128       |
| Conv1d-86                   | [64, 12]          | 12,352    |
| ReLU-87                     | [64, 12]          | 0         |
| BatchNorm1d-88              | [64, 12]          | 128       |
| Conv1d-89                   | [64, 12]          | 12,352    |
| ResNet-90                   | [64, 12]          | 0         |
| AvgPool1d-91                | [64, 6]           | 0         |
| Encoder-92                  | [64, 6]           | 0         |
| PositionalEncoder-93        | [6, 64]           | 0         |
| MultiheadAttention-94       | [[2, 64], [6, 6]] | 0         |
| Dropout-95                  | [2, 64]           | 0         |
| LayerNorm-96                | [2, 64]           | 128       |
| Linear-97                   | [2, 256]          | 16,64     |
| Dropout-98                  | [2, 256]          | 0         |
| Linear-99                   | [2, 64]           | 16,448    |
| Dropout-100                 | [2, 64]           | 0         |
| LayerNorm-101               | [2, 64]           | 128       |
| TransformerEncoderLayer-102 | [2, 64]           | 0         |
| MultiheadAttention-103      | [[2, 64], [6, 6]] | 0         |
| Dropout-104                 | [2, 64]           | 0         |
| LayerNorm-105               | [2, 64]           | 128       |
| Linear-106                  | [2, 256]          | 16,64     |
| Dropout-107                 | [2, 256]          | 0         |
| Linear-108                  | [2, 64]           | 16,448    |
| Dropout-109                 | [2, 64]           | 0         |
| LayerNorm-110               | [2, 64]           | 128       |
| TransformerEncoderLayer-111 | [2, 64]           | 0         |
| MultiheadAttention-112      | [[2, 64], [6, 6]] | 0         |
| Dropout-113                 | [2, 64]           | 0         |
| LayerNorm-114               | [2, 64]           | 128       |
| Linear-115                  | [2, 256]          | 16,64     |
| Dropout-116                 | [2, 256]          | 0         |
| Linear-117                  | [2, 64]           | 16,448    |
| Dropout-118                 | [2, 64]           | 0         |
| LayerNorm-119               | [2, 64]           | 128       |
| TransformerEncoderLayer-120 | [2, 64]           | 0         |
| TransformerEncoder-121      | [2, 64]           | 0         |
| BatchNorm1d-122             | [385]             | 770       |
| Linear-123                  | [1000]            | 386       |
| ELU-124                     | [1000]            | 0         |
| BatchNorm1d-125             | [1000]            | 2         |
| Dropout-126                 | [1000]            | 0         |
| Linear-127                  | [1000]            | 1,001,000 |
| Linear-128                  | [1000]            | 1,001,000 |
| Linear-129                  | [2]               | 2,002     |
| Softmax-130                 | [2]               | 0         |

## References

- Lin, T.-Y. *et al.* (2017). Focal loss for dense object detection. In *Proceedings of the IEEE International Conference on Computer Vision*, pages 2980–2988.
- Sutskever, I. *et al.* (2013). On the importance of initialization and momentum in deep learning. In *Proceedings of the 30th International Conference on Machine Learning*, volume 28, pages 1139–1147.
